# Supplementary material
Source: Research Square preprint supplement (doi:10.21203/rs.3.rs-8965724/v1)
Supplement: Supplementary file 1 [file 056b70ab70c079a12b10f0b9.pdf]

**Study:** The Infrastructure Paradox of AI Development in LMICs

## **Data Availability Statement**

The dataset supporting the findings of this study is publicly available in the Harvard Dataverse repository at <https://doi.org/10.7910/DVN/VJY5QV>. They comprise the following:

### **1. Dataset and variable documentation**

The repository contains the raw survey responses as exported from Google Forms and the cleaned analytical dataset used for all reported results. Variables cover country, respondent role and sector, income-group classification, electricity infrastructure, internet infrastructure, hardware access and cost, cloud access and cost, training data access and quality, AI policy status, AI interventions and investments, and AI innovation strength. A variable codebook and data dictionary (PDF) documents all variable definitions, coding schemes, and transformations.

Key transformations include: standardisation of country names; mapping of countries to World Bank income groups (low-income, lower-middle-income, upper-middle-income); recoding of categorical survey responses into ordinal numeric variables for affordability, reliability, accessibility, and quality measures; grouping of multi-response items into broader analytical categories; and construction of derived binary indicators for AI policy presence and AI innovation strength.

### **2. Analysis code**

The repository includes a Python notebook and a Stata do-file reproducing the full analytical workflow. The Python notebook covers data import, variable renaming, standardisation, income-group assignment, recoding, descriptive summaries, and figure generation. The Stata do-file covers value labelling, construction of derived variables, cross-tabulations, chi-square tests of association stratified by income group, and export of the analytical tables reported in the manuscript. The main inferential procedure was the chi-square test of independence, examining associations between infrastructure variables and three outcomes: existence of AI policy, existence of AI interventions or investments, and AI innovation strength. All percentage distributions reported in the tables were generated from within-group cross-tabulations.

### **3. Survey instrument**

The full survey questionnaire, including the informed consent disclosure presented to participants, is available as a supplementary PDF document attached..
